# Supplementary material
Source: ML conference proceedings conference paper supplement (https://openreview.net/forum?id=bRPOCQ4xFn)

Linear Risk

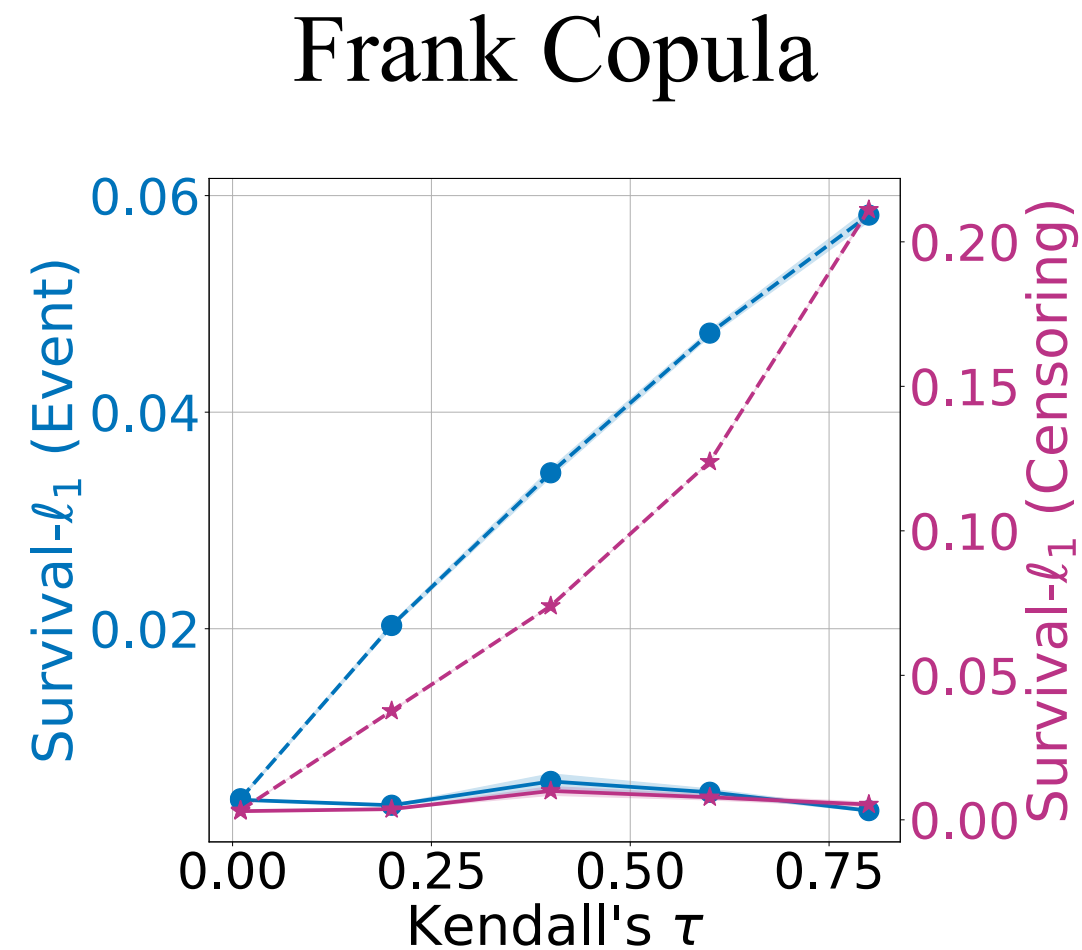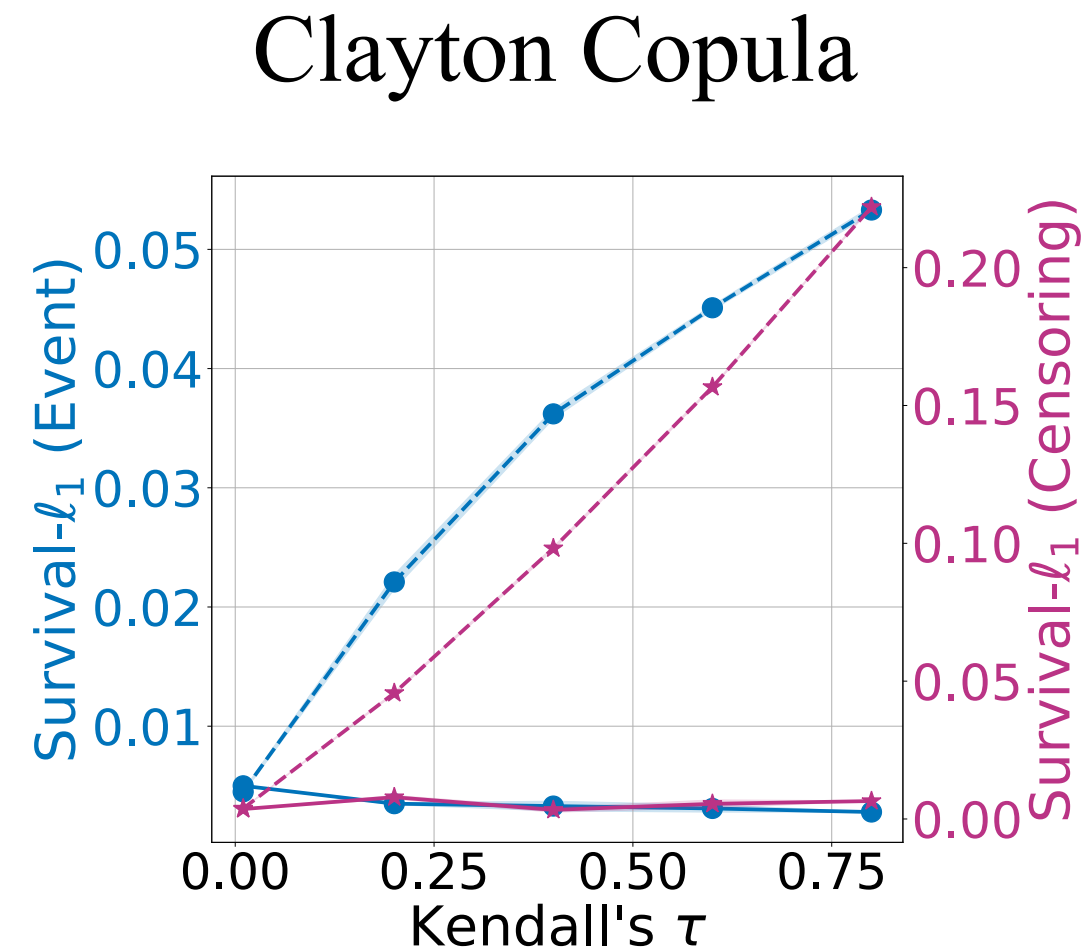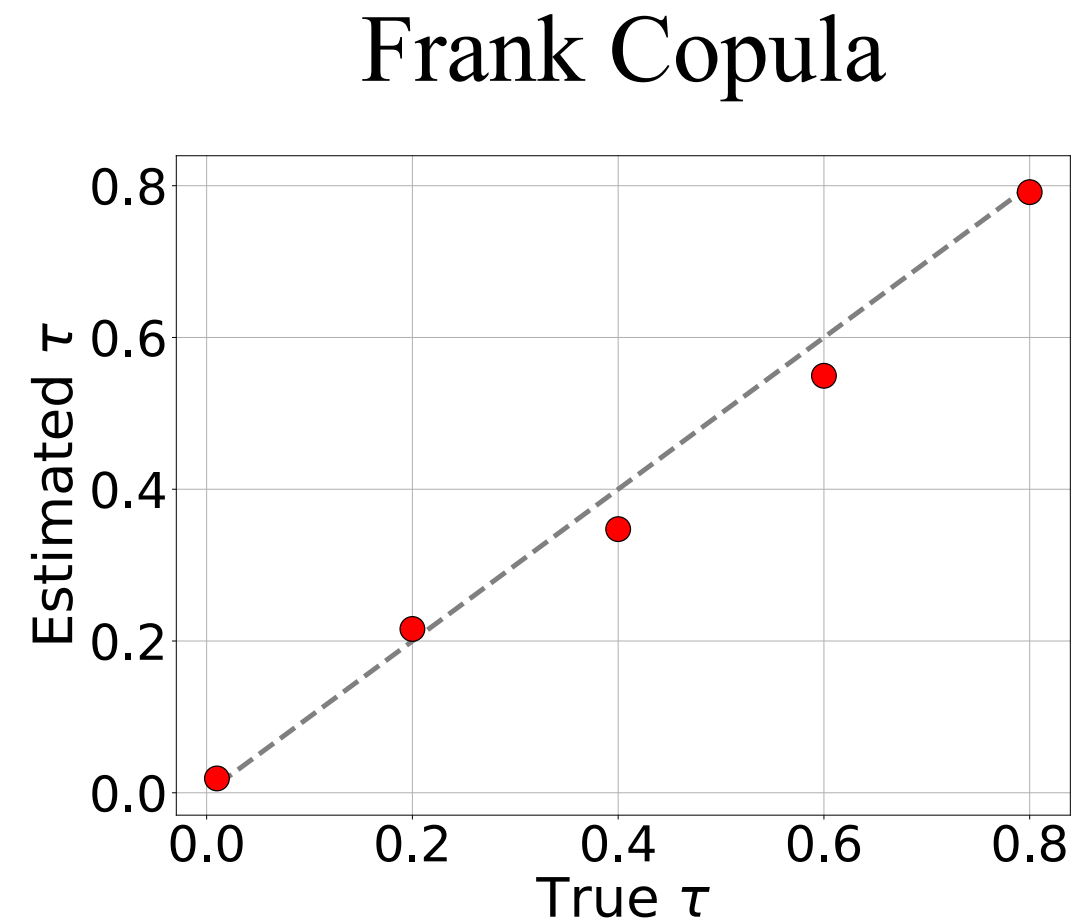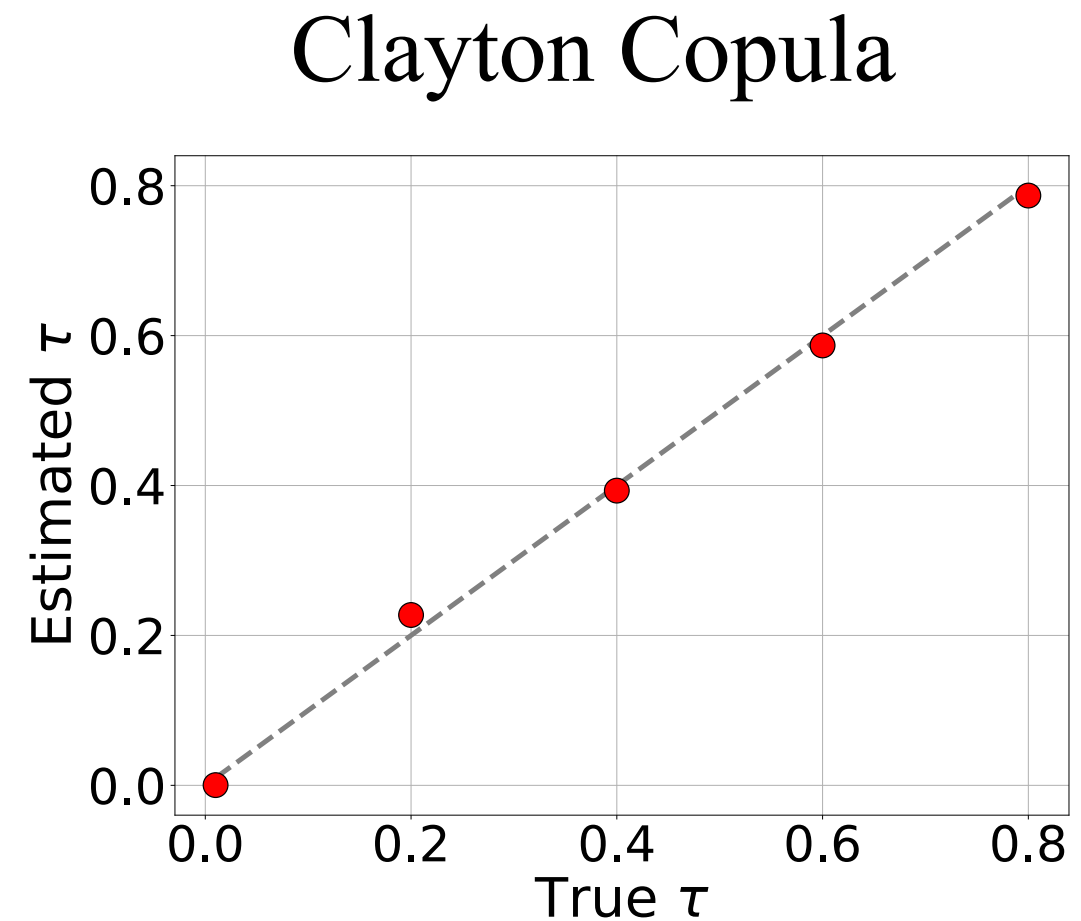

Nonlinear Risk

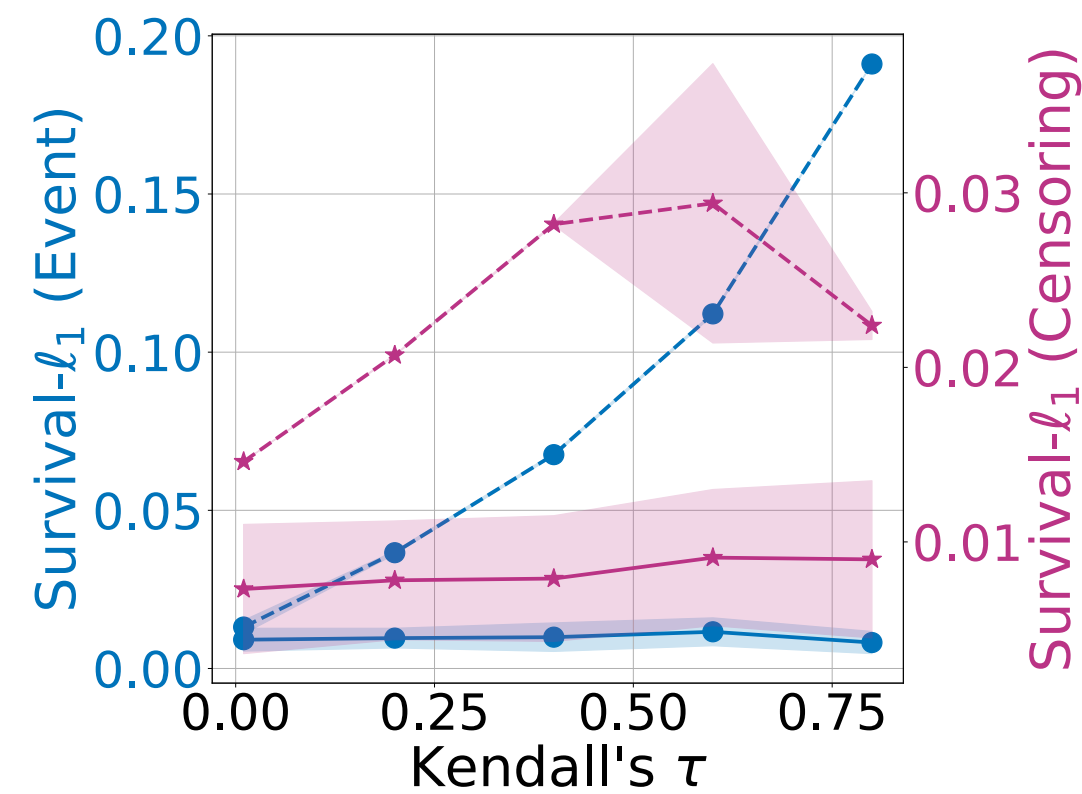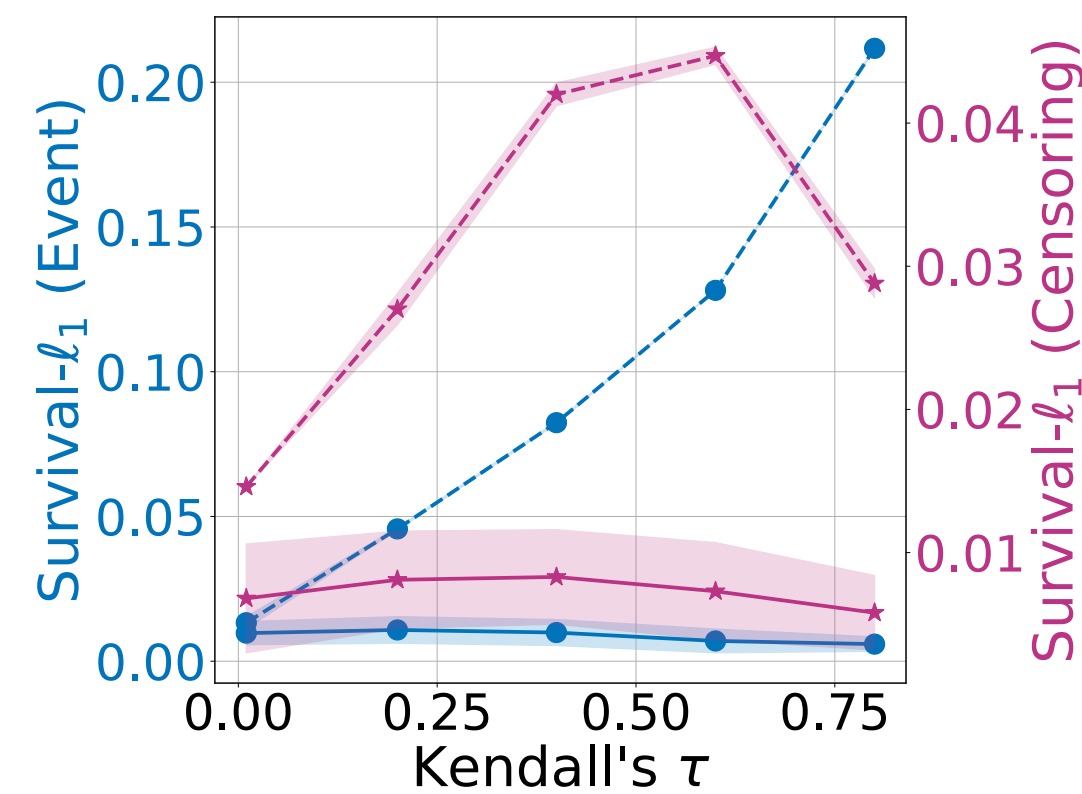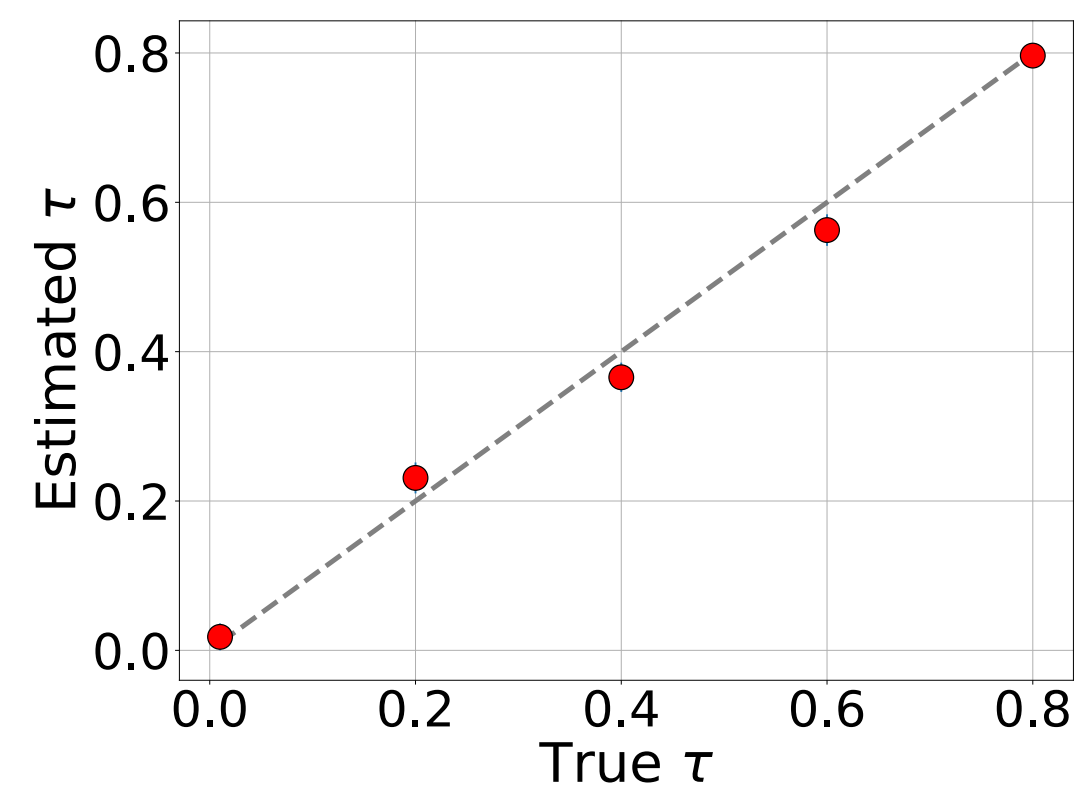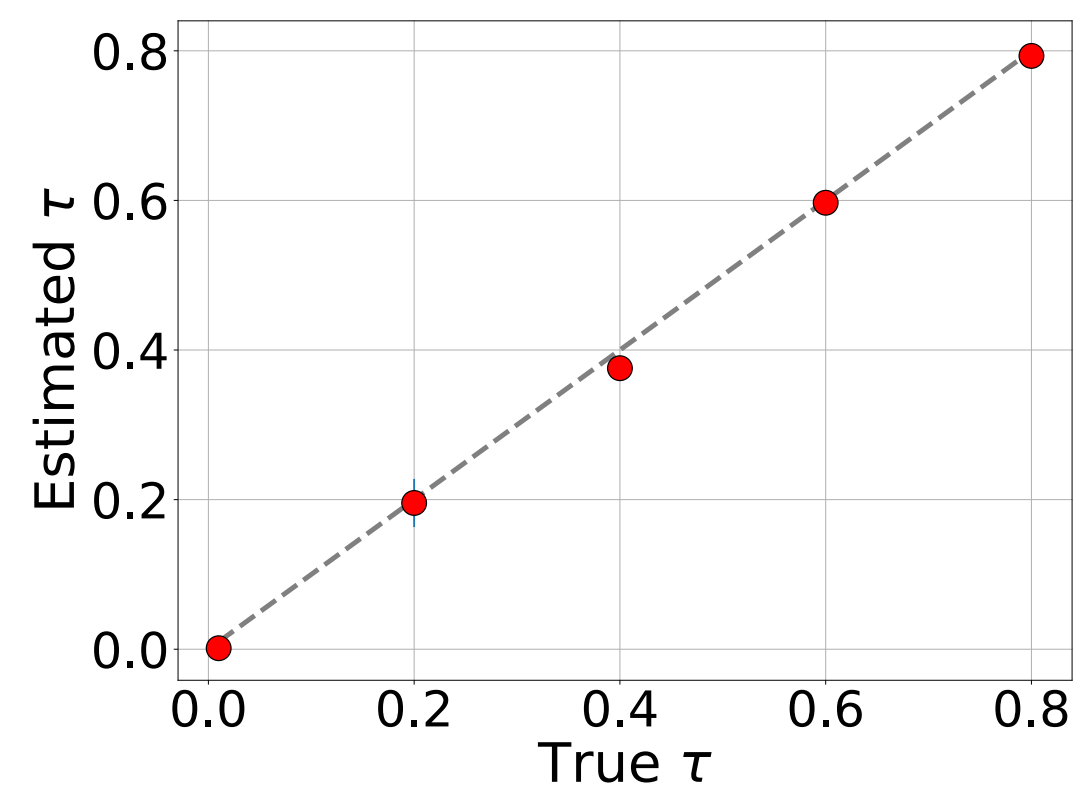

Supplement: supplementary_material [file attachment]

Linear Risk

Frank Copula

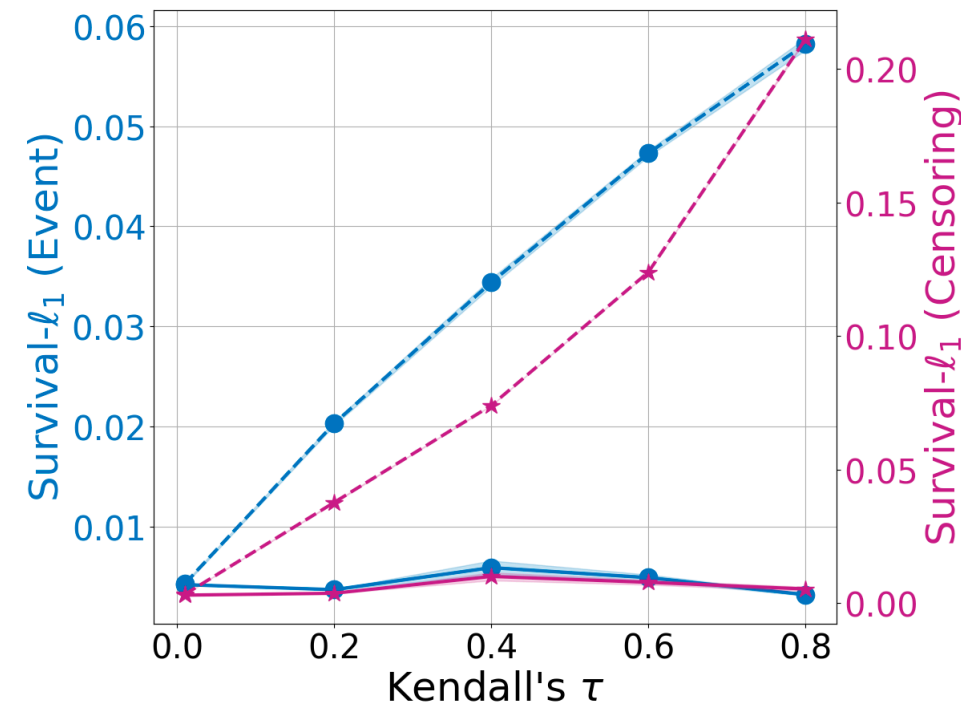

Clayton Copula

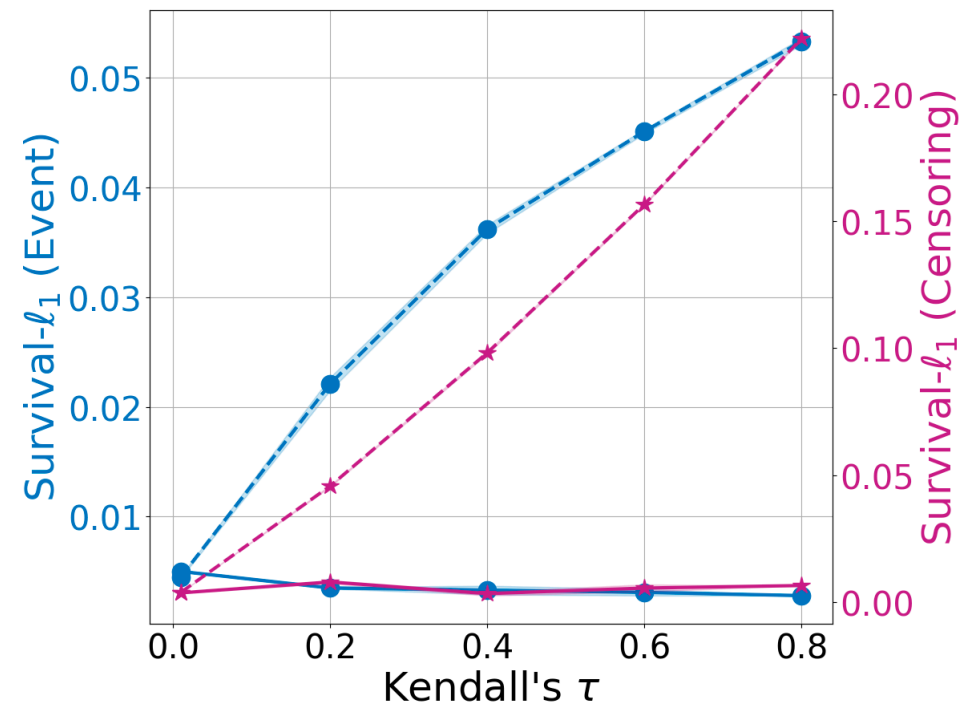

Frank Copula

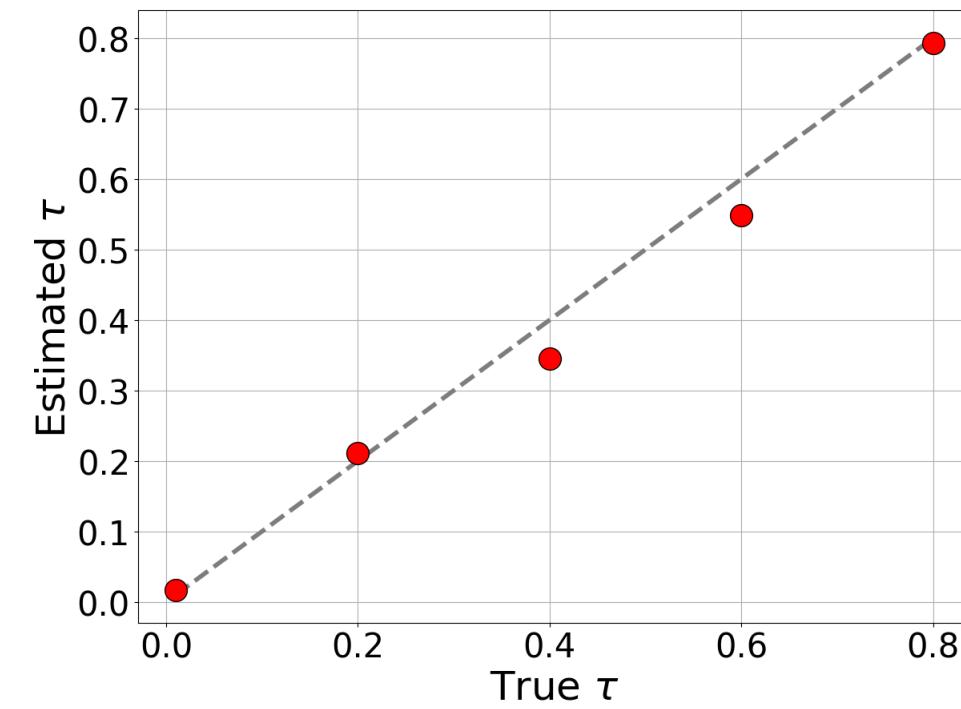

Clayton Copula

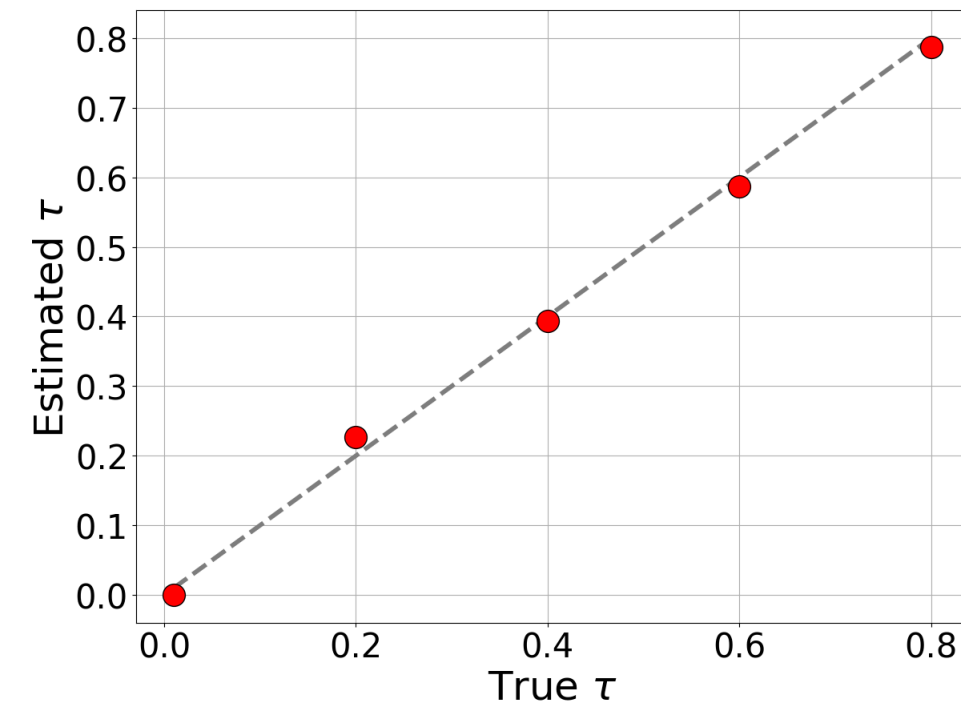

Nonlinear Risk

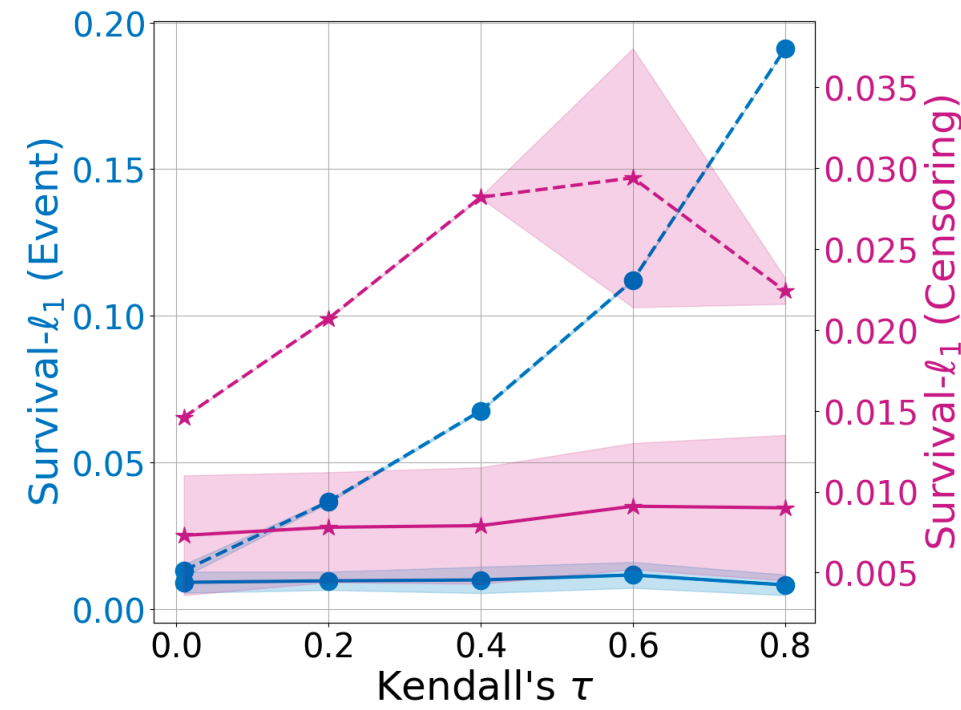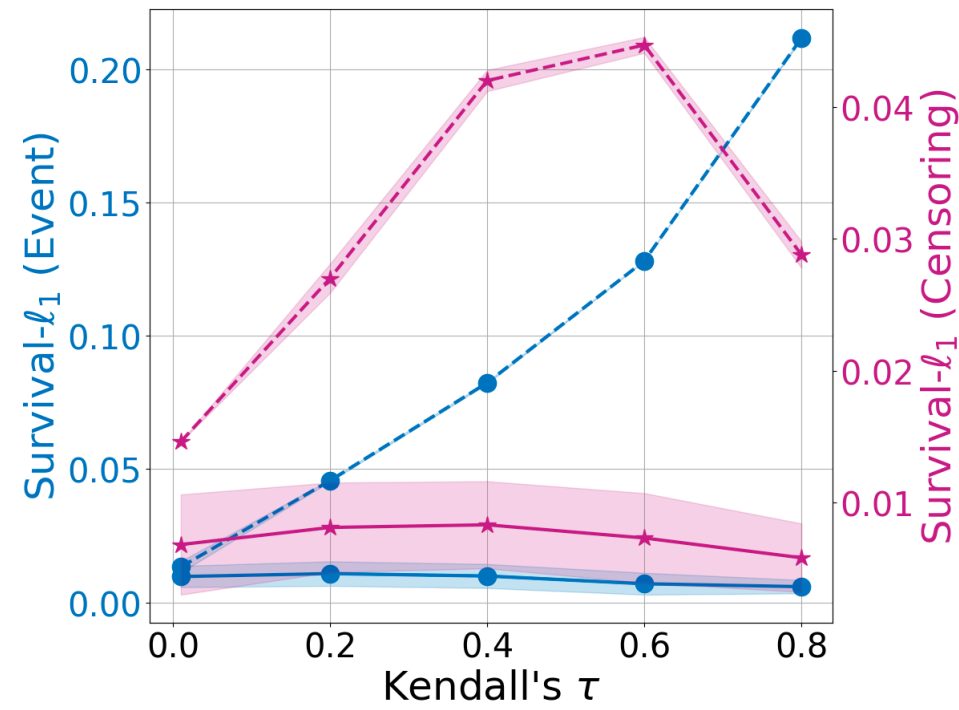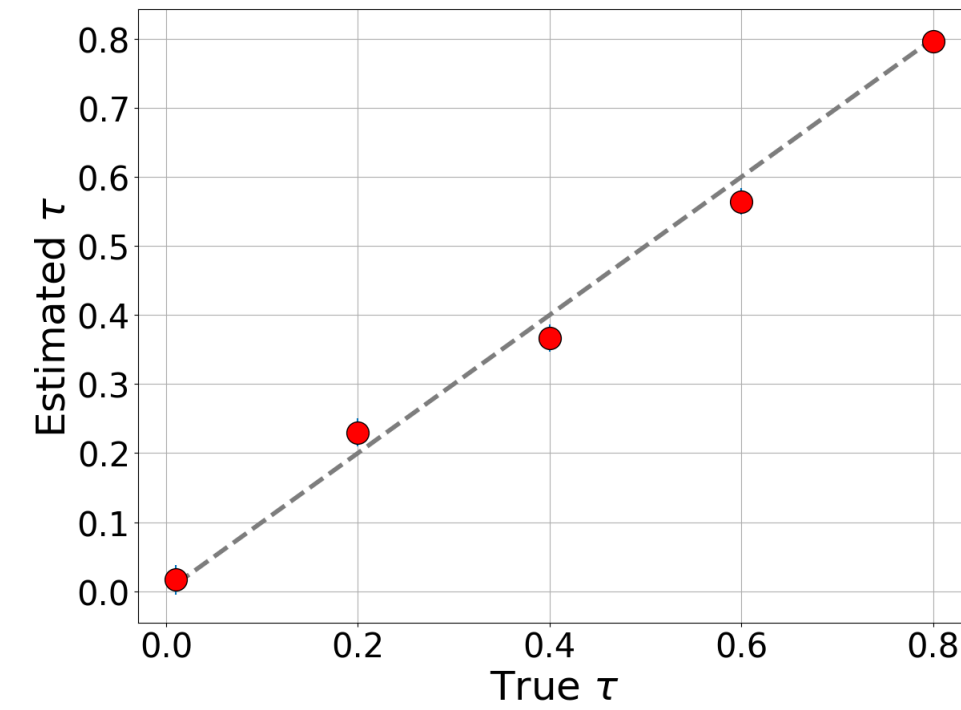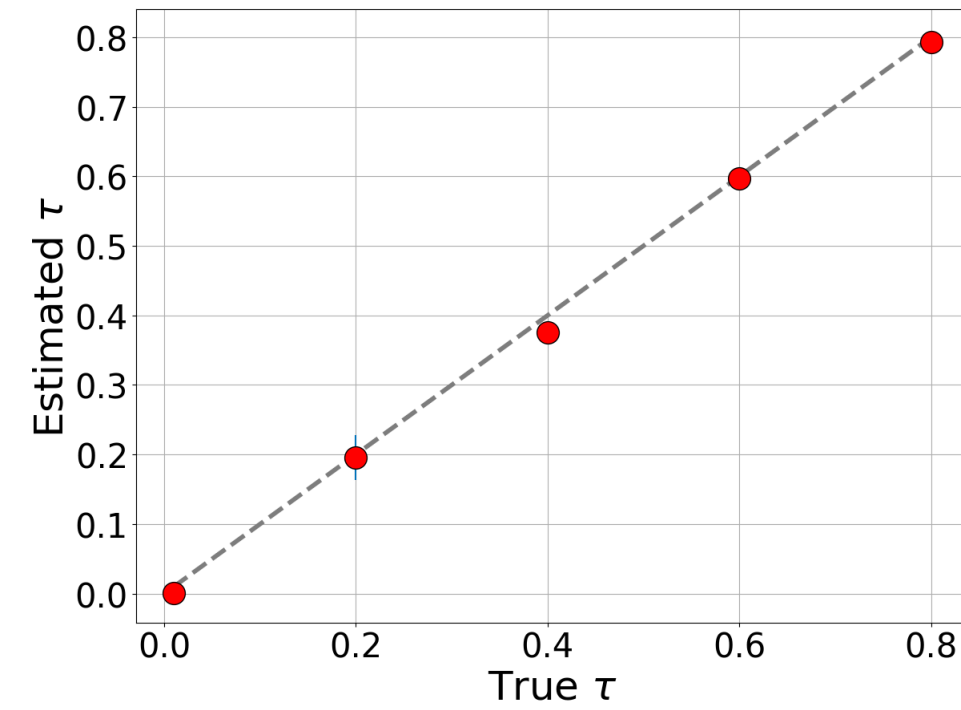

Supplement: supplementary_material [file attachment]

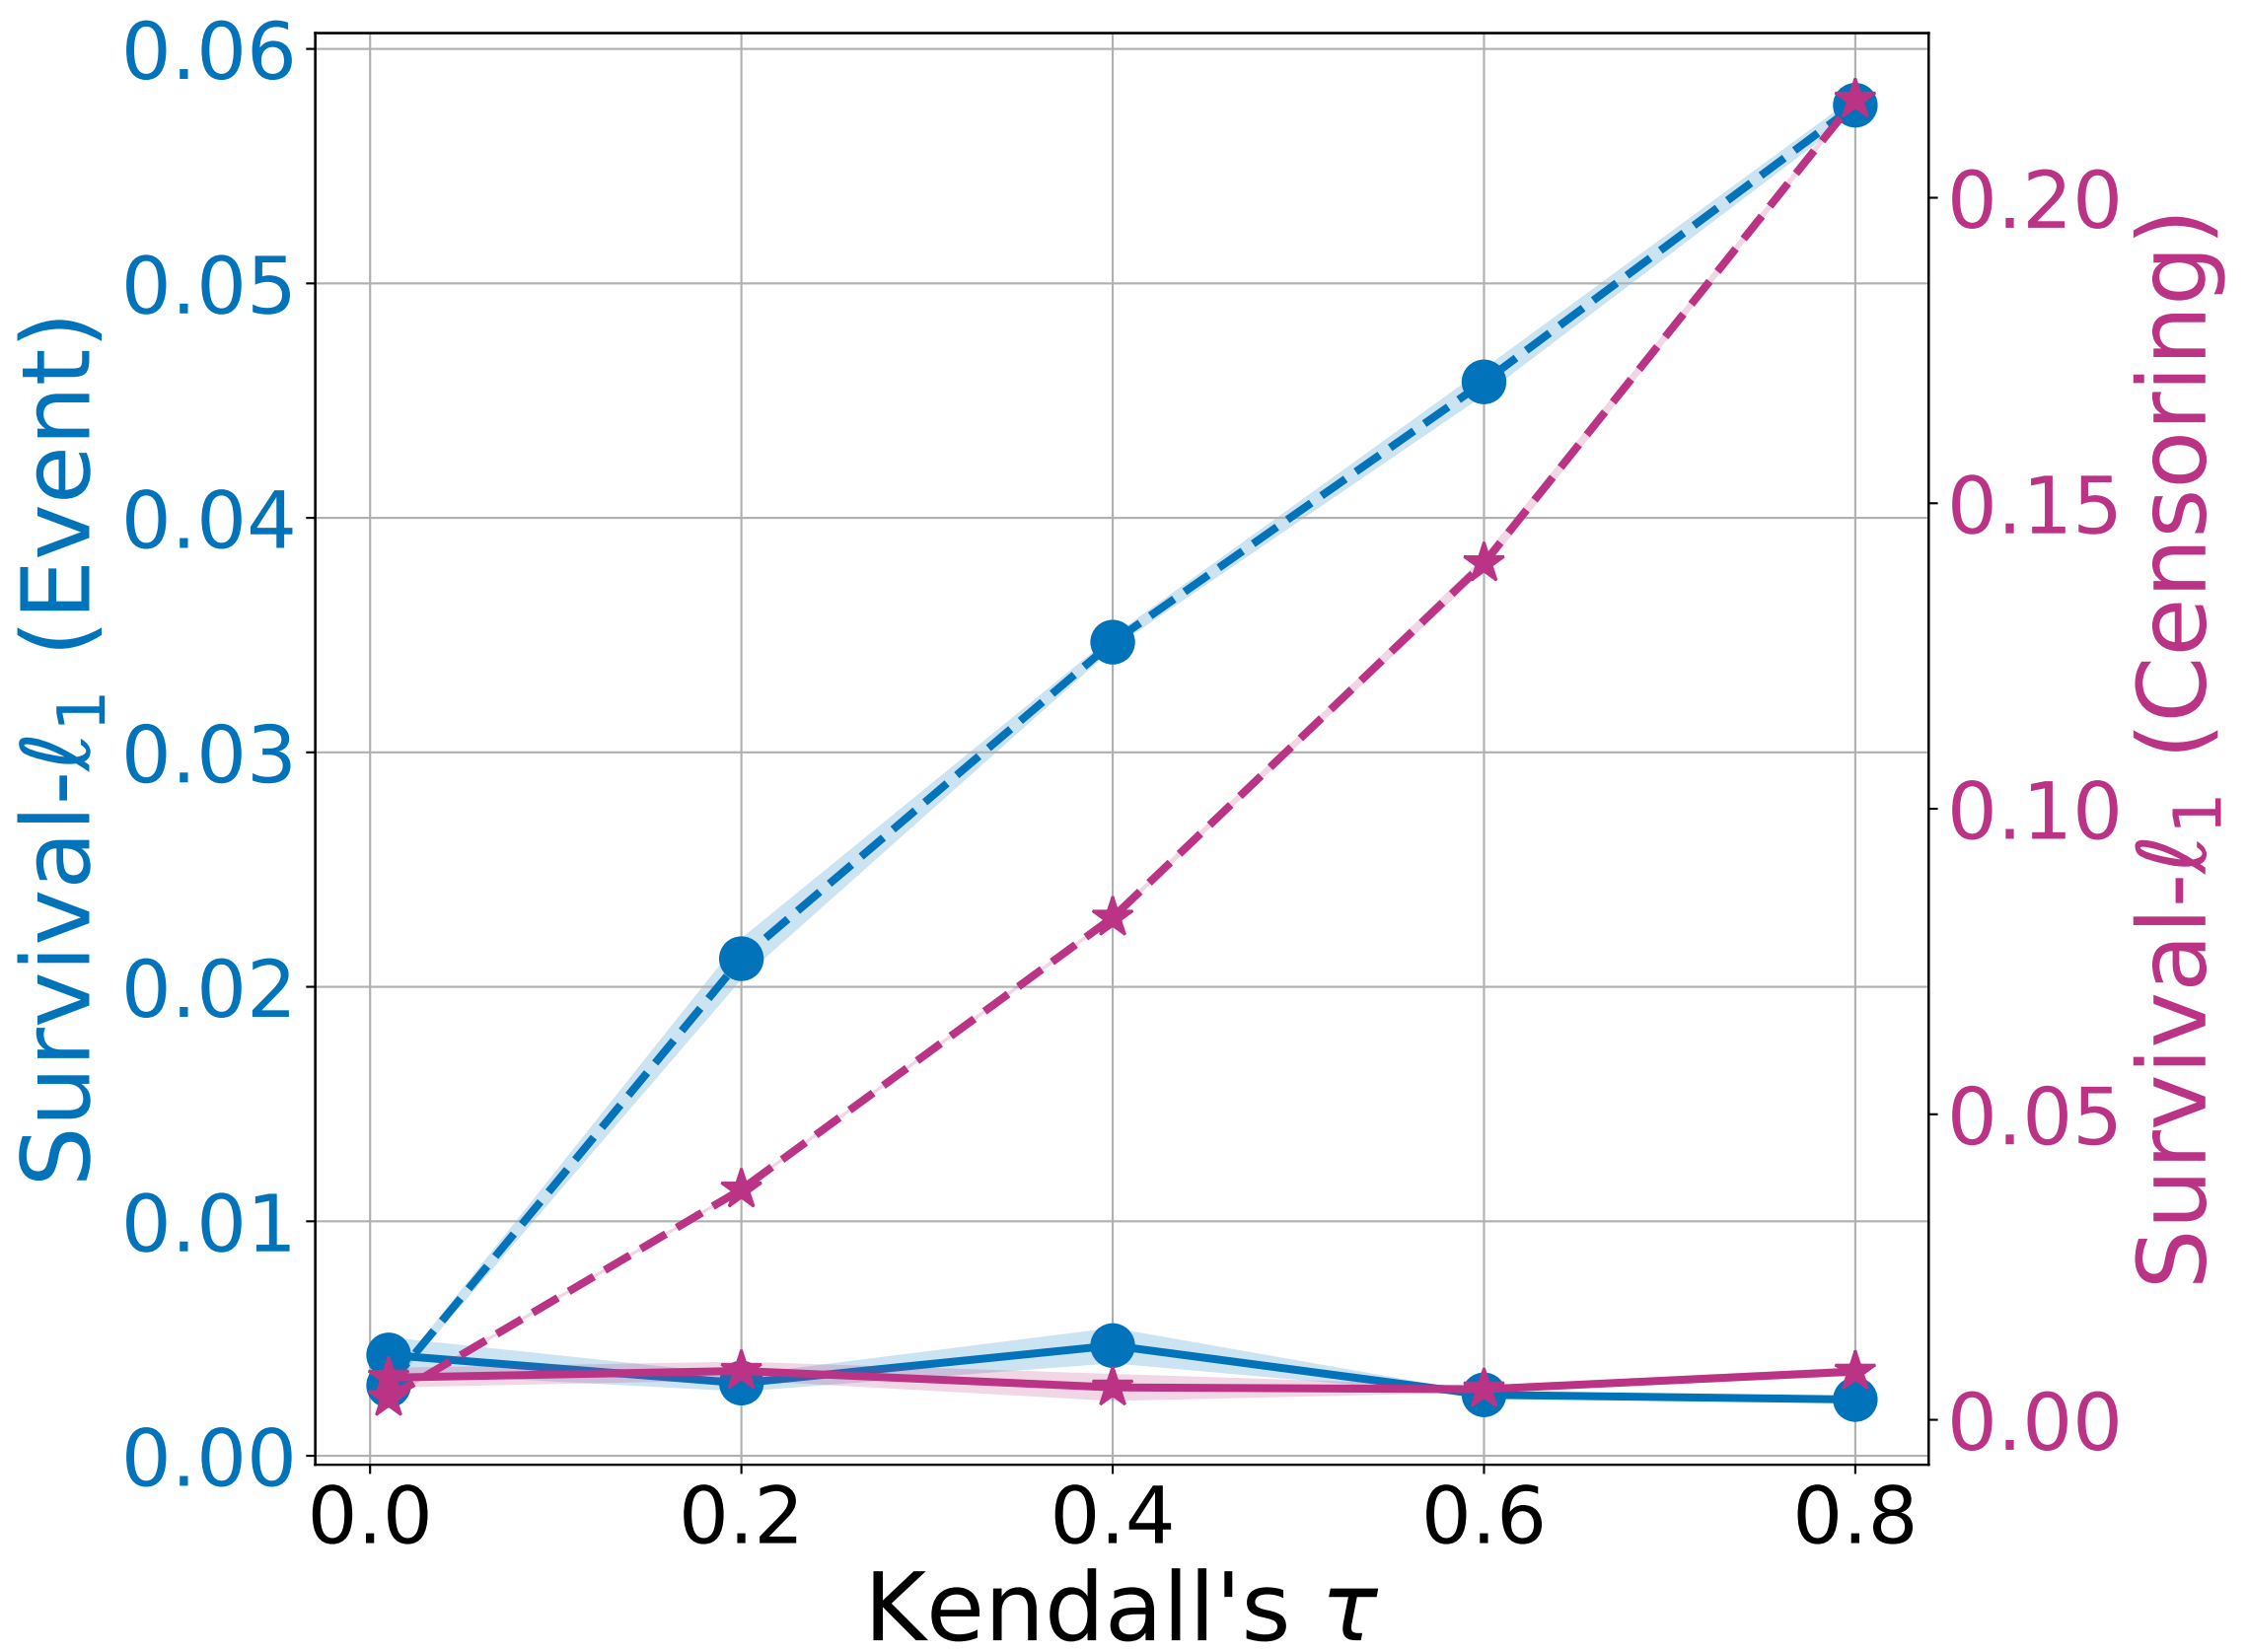

Supplement: supplementary_material [file attachment]
